# Supplementary material for: Exploring the multifunctionality of thioflavin- and deferiprone-based molecules as acetylcholinesterase inhibitors for potential application in Alzheimer's disease
Source: Royal Society of Chemistry journal article supplement (doi:10.1039/c3mb25600f), 2013-02-06
Supplement: c3mb25600f.pdf [file c3mb25600f.pdf]

## Supporting information

# Exploring the multifunctionality of thioflavin- and deferiprone-based molecules as acetylcholinesterase inhibitors for potential application in Alzheimer's disease

Maria A. Telpoukhovskaia, Brian O. Patrick, Cristina Rodríguez-Rodríguez\* and Chris Orvig\*

### Complete References

(67) Frisch, M. J.; Trucks, G. W.; Schlegel, H. B.; Scuseria, G. E.; Robb, M. A.; Cheesman, J. R.; Montgomery, J. A.; Vreven, T.; Kudin, K. N.; Burant, J. C.; Millam, J. M.; Iyengar, S. S.; Tomasi, J.; Barone, V.; Mennucci, B.; Cossi, M.; Scalmani, G.; Rega, N.; Petersson, G. A.; Nakatsuji, H.; Hada, M.; Ehara, M.; Toyota, K.; Fukuda, R.; Hasegawa, J.; Ishida, M.; Nakajima, T.; Honda, Y.; Kitao, O.; Nakai, H.; Klene, M.; Li, X.; Knox, J. E.; Hratchian, H. P.; Cross, J. B.; Adamo, C.; Jaramillo, J.; Gomperts, R.; Stratmann, R. E.; Yazyev, O.; Austin, A. J.; Cammi, R.; Pomelli, C.; Ochterski, J. W.; Ayala, P. Y.; Morokuma, K.; Voth, G. A.; Salvador, P.; Dannenberg, J. J.; Zakrzewski, V. G.; Dapprich, S.; Daniels, A. D.; Strain, M. C.; Farkas, O.; Malick, D. K.; Rabuck, A. D.; Raghavachari, K.; Foresman, J. B.; Ortiz, J. V.; Cui, Q.; Baboul, A. G.; Clifford, S.; Cioslowski, J.; Stefanov, B. B.; Liu, G.; Liashenko, A.; Piskorz, P.; Komaromi, I.; Martin, R. L.; Fox, D. J.; Keith, T.; Al-Laham, M. A.; Peng, C. Y.; Nanayakkara, A.; Challacombe, M.; Gill, P. M. W.; Johnson, B.; Chen, W.; Wong, M. W.; González, C.; Pople, J. A.; Gaussian Inc.: Wallingford CT, 2010.

**Table S1.** Crystal and Refinement Data for **BXc**, **BTc**, **Hppp** and **Cppp**

| cryst data                                  | <b>BXc</b>                                                    | <b>BTc</b>                                                      |
|---------------------------------------------|---------------------------------------------------------------|-----------------------------------------------------------------|
| formula                                     | C <sub>16</sub> H <sub>14</sub> N <sub>2</sub> O <sub>3</sub> | C <sub>16</sub> H <sub>14</sub> N <sub>2</sub> O <sub>2</sub> S |
| fw                                          | 282.29                                                        | 298.35                                                          |
| crystal system                              | monoclinic                                                    | monoclinic                                                      |
| space group                                 | P2 <sub>1</sub> /c                                            | P2 <sub>1</sub> /c                                              |
| color of crystal                            | colorless                                                     | pale yellow                                                     |
| a (Å)                                       | 9.2499(4)                                                     | 9.7184(4)                                                       |
| b (Å)                                       | 17.8481(7)                                                    | 13.6885(6)                                                      |
| c (Å)                                       | 9.1282(4)                                                     | 10.8658(5)                                                      |
| α (deg)                                     | 90                                                            | 90                                                              |
| β (deg)                                     | 115.0460(10)                                                  | 106.839(3)                                                      |
| γ (deg)                                     | 90                                                            | 90                                                              |
| V [Å <sup>3</sup> ]                         | 1365.30(10)                                                   | 1383.50(10)                                                     |
| Temp (K)                                    | 100.0(2)                                                      | 90.0(1)                                                         |
| Z                                           | 4                                                             | 4                                                               |
| D <sub>calcd</sub> [g/cm <sup>3</sup> ]     | 1.373                                                         | 1.432                                                           |
| μ (Mo Kα) [cm <sup>-1</sup> ]               | 0.97                                                          | 2.40                                                            |
| F <sub>000</sub>                            | 592                                                           | 624                                                             |
| θ <sub>min</sub> -θ <sub>max</sub> (deg)    | 2.28 – 30.18                                                  | 2.19 – 30.10                                                    |
| hkl range                                   | -13/10,-24/25,-12/11                                          | -13/13,-19/19,-15/13                                            |
| reflections collected                       | 23774                                                         | 21989                                                           |
| independent reflections (R <sub>int</sub> ) | 4018 (0.029)                                                  | 4066 (0.038)                                                    |
| observed reflection [I>2σ(I)]               | 3200                                                          | 3256                                                            |
| agreement indexes [I>2σ(I)]                 | R(F) = 0.038<br>R <sub>w</sub> (F <sup>2</sup> ) = 0.090      | R(F) = 0.037<br>R <sub>w</sub> (F <sup>2</sup> ) = 0.085        |
| agreement indexes (all data)                | R(F) = 0.052<br>R <sub>w</sub> (F <sup>2</sup> ) = 0.098      | R(F) = 0.054<br>R <sub>w</sub> (F <sup>2</sup> ) = 0.095        |
| GOF (all data)                              | 1.02                                                          | 1.05                                                            |
| cryst data                                  | <b>Hppp</b>                                                   | <b>Cppp</b>                                                     |
| formula                                     | C <sub>12</sub> H <sub>11</sub> NO <sub>2</sub> MeOH          | C <sub>15</sub> H <sub>16</sub> N <sub>2</sub> O <sub>3</sub>   |
| fw                                          | 233.26                                                        | 272.30                                                          |
| crystal system                              | triclinic                                                     | triclinic                                                       |
| space group                                 | P <sub>-1</sub>                                               | P <sub>-1</sub>                                                 |
| color of crystal                            | colorless                                                     | colorless                                                       |
| a (Å)                                       | 7.597(1)                                                      | 7.9251(4)                                                       |
| b (Å)                                       | 9.601(2)                                                      | 8.3409(4)                                                       |
| c (Å)                                       | 9.999(2)                                                      | 11.1686(6)                                                      |
| α (deg)                                     | 100.928(4)                                                    | 97.746(3)                                                       |
| β (deg)                                     | 111.838(3)                                                    | 110.719(3)                                                      |
| γ (deg)                                     | 107.261(3)                                                    | 95.600(3)                                                       |
| V [Å <sup>3</sup> ]                         | 608.4(2)                                                      | 1114.6(2)                                                       |
| Temp (K)                                    | 90(1)                                                         | 100(2)                                                          |
| Z                                           | 2                                                             | 2                                                               |
| D <sub>calcd</sub> [g/cm <sup>3</sup> ]     | 1.273                                                         | 1.338                                                           |
| μ (Mo Kα) [cm <sup>-1</sup> ]               | 0.91                                                          | 0.94                                                            |
| F <sub>000</sub>                            | 248                                                           | 288                                                             |
| θ <sub>min</sub> -θ <sub>max</sub> (deg)    | 2.33-28.78                                                    | 2.75-28.26                                                      |
| hkl range                                   | -10/10, -12/13, -13/13                                        | -10/10, -11/10, -14/14                                          |
| reflections collected                       | 13793                                                         | 12110                                                           |
| independent reflections (R <sub>int</sub> ) | 3135 (0.039)                                                  | 3322 (0.027)                                                    |
| observed reflection [I>2σ(I)]               | 2250                                                          | 2665                                                            |
| agreement indexes [I>2σ(I)]                 | R(F) = 0.050<br>R <sub>w</sub> (F <sup>2</sup> ) = 0.131      | R(F) = 0.042<br>R <sub>w</sub> (F <sup>2</sup> ) = 0.108        |
| agreement indexes (all data)                | R(F) = 0.075<br>R <sub>w</sub> (F <sup>2</sup> ) = 0.147      | R(F) = 0.055<br>R <sub>w</sub> (F <sup>2</sup> ) = 0.118        |
| GOF (all data)                              | 1.04                                                          | 1.02                                                            |

**Table S2.** Selected bond lengths (Å) and angles (°) in **BXc**, **BTc**, **Cppp** and **Hppp**

| <b>BXc</b>    |                 | <b>BTc</b>    |                 |
|---------------|-----------------|---------------|-----------------|
| <b>Atoms</b>  | <b>Distance</b> | <b>Atoms</b>  | <b>Distance</b> |
| C1-C2         | 1.3982(14)      | C1-C2         | 1.3957(19)      |
| C2-C3         | 1.4033(14)      | C2-C3         | 1.4022(19)      |
| C3-C4         | 1.3793(17)      | C3-C4         | 1.384(2)        |
| C4-C5         | 1.3862(16)      | C4-C5         | 1.387(2)        |
| C5-C6         | 1.3866(14)      | C5-C6         | 1.382(2)        |
| C6-C1         | 1.3772(15)      | C6-C1         | 1.3864(19)      |
| C1-O1         | 1.3965(11)      | C1-O1         | 1.3915(16)      |
| <b>Atoms</b>  | <b>Angle</b>    | <b>Atoms</b>  | <b>Angle</b>    |
| C1-C2-C12-O13 | 176.3(12)       | C1-C2-C12-S13 | 6.13(19)        |
| C1-C2-C12-N11 | -3(3)           | C1-C2-C12-N11 | -174.10(13)     |
| C3-C2-C12-O13 | -3(3)           | C3-C2-C12-S13 | -175.31(10)     |
| C3-C2-C12-N11 | 178(2)          | C3-C2-C12-N11 | 4.47(19)        |

| <b>Hppp</b>  |                 | <b>Cppp</b>  |                 |
|--------------|-----------------|--------------|-----------------|
| <b>Atoms</b> | <b>Distance</b> | <b>Atoms</b> | <b>Distance</b> |
| C3-O2        | 1.353(2)        | C3-O2        | 1.404(1)        |
| C4-O1        | 1.261(2)        | C4-O1        | 1.252(2)        |
| C2-N1        | 1.381(2)        | C2-N1        | 1.389(2)        |
| C2-C3        | 1.368(2)        | C2-C3        | 1.363(2)        |
| C3-C4        | 1.436(2)        | C3-C4        | 1.447(2)        |
| C4-C5        | 1.413(2)        | C4-C5        | 1.447(2)        |
| C5-C6        | 1.357(2)        | C5-C6        | 1.354(2)        |
| C6-N1        | 1.360(2)        | C6-N1        | 1.373(2)        |
| <b>Atoms</b> | <b>Angle</b>    | <b>Atoms</b> | <b>Angle</b>    |
| C8-C7-N1-C6  | -70.15(19)      | C8-C7-N1-C6  | 104.07(14)      |
| C12-C7-N1-C6 | 107.45(16)      | C12-C7-N1-C6 | -75.52(15)      |
| C12-C7-N1-C2 | -71.92(19)      | C12-C7-N1-C2 | 101.48(14)      |
| C8-C7-N1-C2  | 110.48(16)      | C8-C7-N1-C2  | -78.93(15)      |

**Table S3.** Physicochemical properties and log BB calculated values. All the parameters are defined in the manuscript.

|                  | 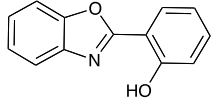 |  |  |  |  |  |
|------------------|-----------------------------------------------------------------------------------|-----------------------------------------------------------------------------------|------------------------------------------------------------------------------------|-------------------------------------------------------------------------------------|-------------------------------------------------------------------------------------|-------------------------------------------------------------------------------------|
| ID               | <b>HBX</b>                                                                        | <b>BXc</b>                                                                        | <b>HBT</b>                                                                         | <b>BTc</b>                                                                          | <b>Hppp</b>                                                                         | <b>Cppp</b>                                                                         |
| MW               | 211.22                                                                            | 282.29                                                                            | 227.28                                                                             | 298.36                                                                              | 201.22                                                                              | 272.30                                                                              |
| clogP            | 2.74                                                                              | 2.90                                                                              | 3.42                                                                               | 3.56                                                                                | 0.97                                                                                | 0.39                                                                                |
| TPSA             | 46.26                                                                             | 55.57                                                                             | 33.12                                                                              | 42.43                                                                               | 40.54                                                                               | 49.85                                                                               |
| LogD             | 3.01                                                                              | 3.06                                                                              | 3.82                                                                               | 3.86                                                                                | 2.35                                                                                | 2.38                                                                                |
| HBA              | 2                                                                                 | 2                                                                                 | 2                                                                                  | 2                                                                                   | 3                                                                                   | 3                                                                                   |
| HBD              | 1                                                                                 | 0                                                                                 | 1                                                                                  | 0                                                                                   | 1                                                                                   | 0                                                                                   |
| rotatable bonds  | 1                                                                                 | 3                                                                                 | 1                                                                                  | 3                                                                                   | 1                                                                                   | 3                                                                                   |
| ring count       | 3                                                                                 | 3                                                                                 | 3                                                                                  | 3                                                                                   | 2                                                                                   | 2                                                                                   |
| Lipinski's rules | true                                                                              | true                                                                              | true                                                                               | true                                                                                | true                                                                                | true                                                                                |
| Lead likeness    | true                                                                              | true                                                                              | true                                                                               | true                                                                                | true                                                                                | true                                                                                |
| Log BB           | -0.13                                                                             | -0.24                                                                             | 0.17                                                                               | 0.052                                                                               | -0.31                                                                               | -0.54                                                                               |

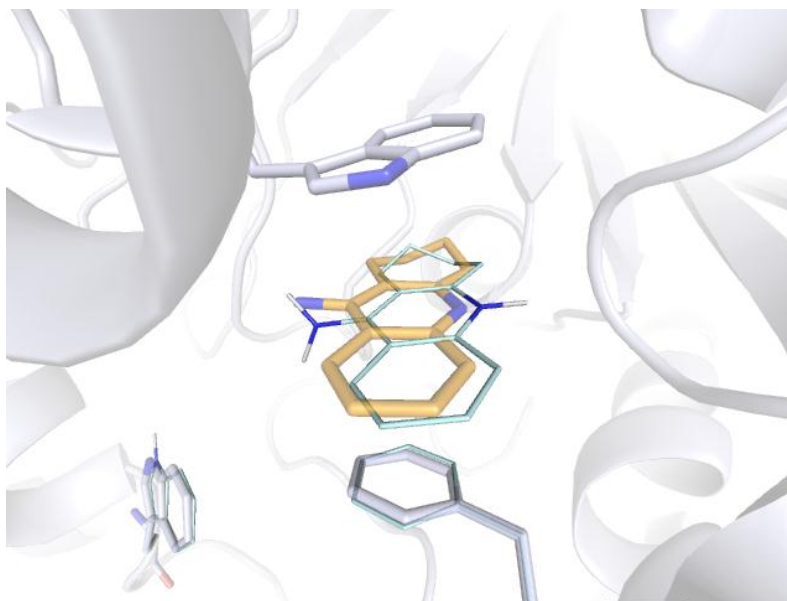

**Fig. S1.** Predicted binding mode of tacrine and X-ray crystallographic structure of *Torpedo Californica* AChE complex (PDB entry 1ACJ). Docked (in lines) and X-ray (in sticks) structures of the ligand are shown. Notably Phe330 and Trp279, allowed flexible during molecular docking, are coincident with X-ray position.
